# Supplementary material for: Sugar-Sweetened Beverages and Depressive and Social Anxiety Symptoms Among Children and Adolescents Aged 7–17 Years, Stratified by Body Composition
Source: PubMed Central journal article supplement (PMC9168881; doi:10.3389/fnut.2022.888671), 2022-05-23
Supplement: Data_Sheet_1.pdf [file Data_Sheet_1.pdf]

## *Supplementary Material*

Supplementary Table 1. Multivariate odds ratios (OR) and 95% confidence intervals (CI) of depressive and social anxiety symptoms for SSB consumption of  $\geq 1$  servings /day.

| SSB Consumption         | None-depressive symptoms | Depressive symptoms     | None-social anxiety | Social anxiety symptoms |
|-------------------------|--------------------------|-------------------------|---------------------|-------------------------|
| <b><i>Model 1</i></b>   |                          |                         |                     |                         |
| <b>Total population</b> |                          |                         |                     |                         |
| $\geq 1$ servings /day  | 1 (Reference)            | <b>2.06 (1.31-3.26)</b> | 1 (Reference)       | 1.17 (0.78-1.77)        |
| <b>Boys (n=658)</b>     |                          |                         |                     |                         |
| $\geq 1$ servings /day  | 1 (Reference)            | <b>3.26 (1.78-5.98)</b> | 1 (Reference)       | 1.42 (0.82-2.46)        |
| <b>Girls (n=653)</b>    |                          |                         |                     |                         |
| $\geq 1$ servings /day  | 1 (Reference)            | 1.20 (0.59-2.43)        | 1 (Reference)       | 0.93 (0.50-1.71)        |
| <b><i>Model 2</i></b>   |                          |                         |                     |                         |
| <b>Total population</b> |                          |                         |                     |                         |
| $\geq 1$ servings /day  | 1 (Reference)            | <b>2.02 (1.23-3.31)</b> | 1 (Reference)       | 1.11 (0.72-1.72)        |
| <b>Boys (n=658)</b>     |                          |                         |                     |                         |
| $\geq 1$ servings /day  | 1 (Reference)            | <b>2.86 (1.45-5.64)</b> | 1 (Reference)       | 1.20 (0.65-2.20)        |
| <b>Girls (n=653)</b>    |                          |                         |                     |                         |
| $\geq 1$ servings /day  | 1 (Reference)            | 1.37 (0.65-2.88)        | 1 (Reference)       | 1.00 (0.53-1.89)        |

Model 1: adjusted for age and sex.

Model 2: additionally adjusted for parental educational attainment, maternal smoking status, single-child status, BMI, incomes, fruit consumption, physical activity, screen time and the frequency of fried food consumption.

Bold values referred to  $P < 0.05$ .

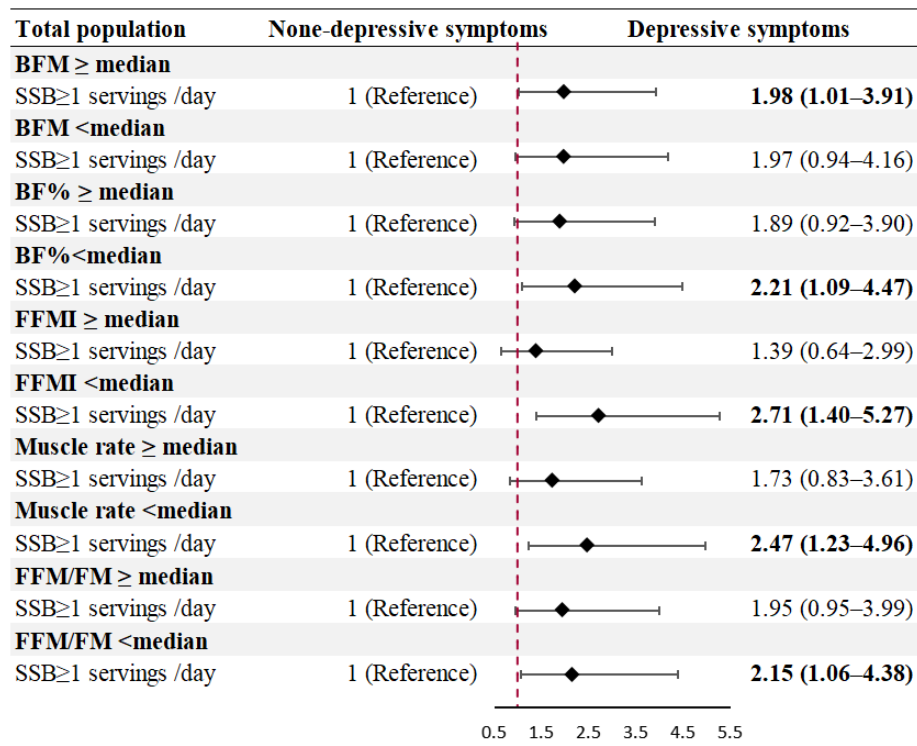

A

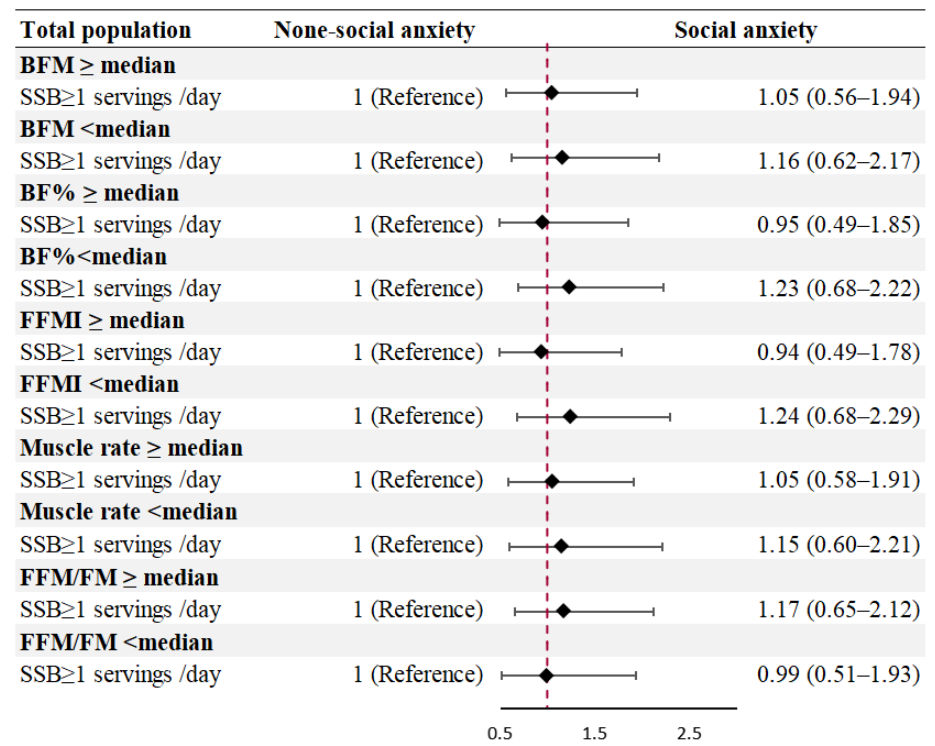

B

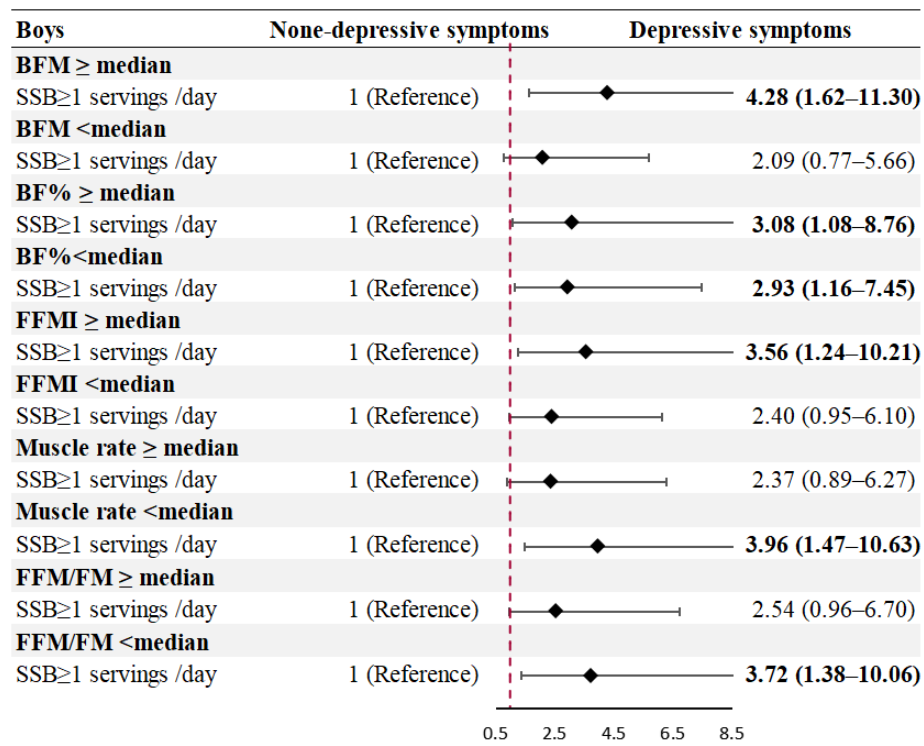

C

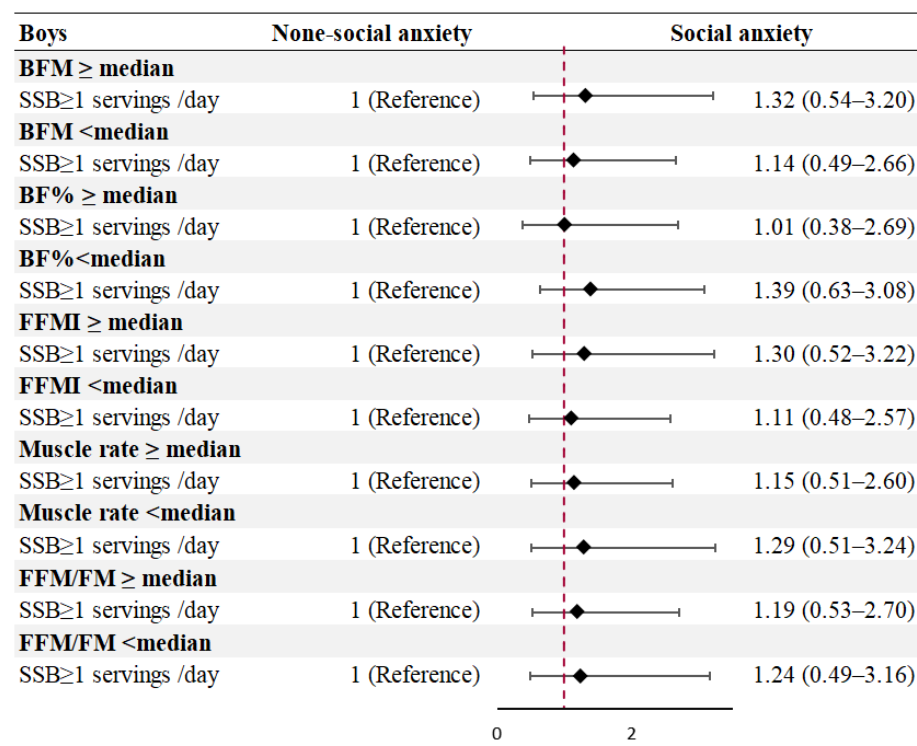

D

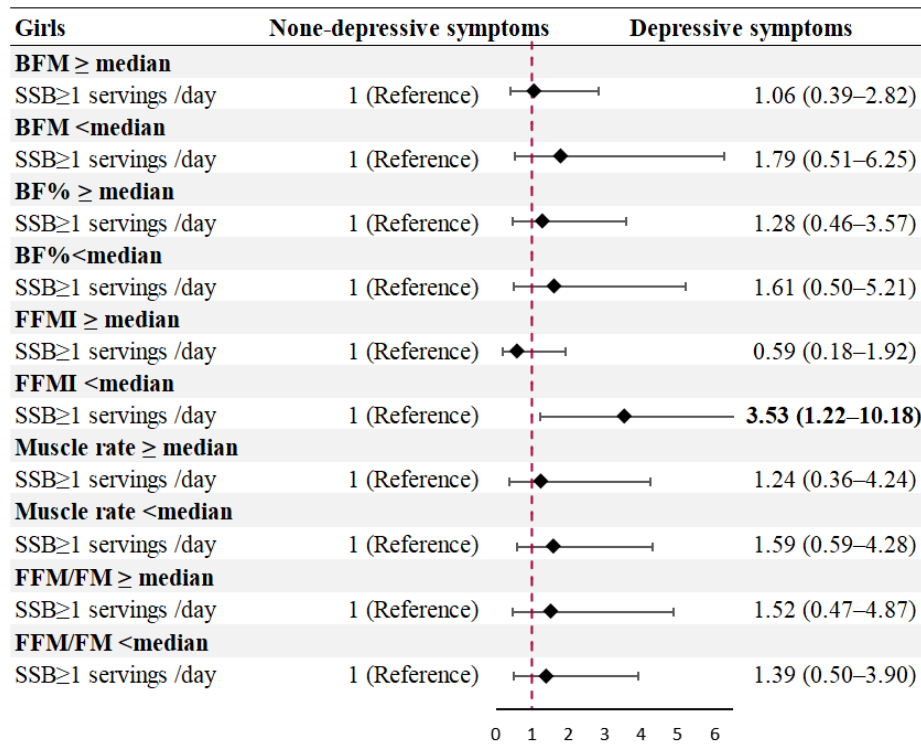

E

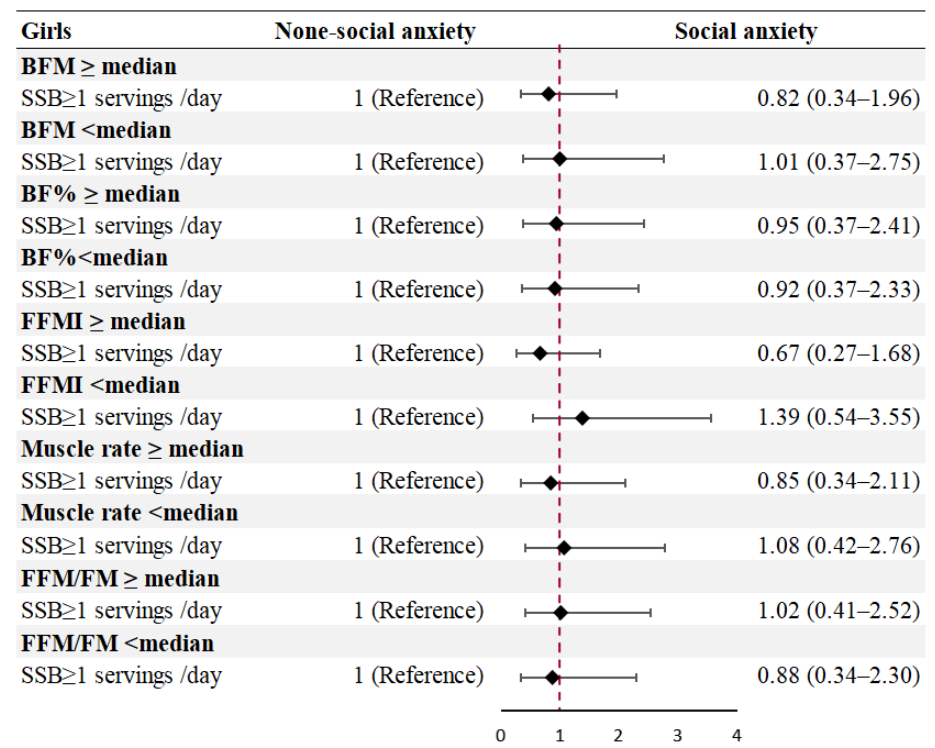

F

Supplementary Figure 1. Multivariate odds ratios (OR) and 95% confidence intervals (CI) of depressive (panel A, C, E) and social anxiety (panel B, D, F) symptoms for SSB consumption  $\geq 1$  servings /day among the total population and the each sex groups, stratified by body composition (Model was adjusted for age, sex, parental educational attainment, maternal smoking status, single-child status, BMI, incomes, fruit consumption, physical activity, screen time and the frequency of fried food consumption).
